# Supplementary material for: A qualitative study of GP, NP and patient views about the use of rapid streptococcal antigen detection tests (RADTs) in primary care: ‘swamped with sore throats?’
Source: HighWire-hosted journal article supplement (doi:10.1136/bmjopen-2012-002460), 2013-01-01
Supplement: bmjopen-2012-002460supp_appendix.pdf [file bmjopen-2012-002460supp_appendix.pdf]

## **Appendix 1**

### **Interview Guide**

## **Appendix 1**

### **PRISM Interview guides**

#### **Patient interview guide**

1. Could you tell me what led you (your child) to see the Dr /nurse with a sore throat?
2. During the consultation the GP/nurse did a rapid test. Who did the test? How did you feel about the test?
3. Were you prescribed antibiotics on this occasion? How did you feel about that?
4. Could you tell me a bit about your thoughts on antibiotics?
5. Are you aware of any problems associated with taking antibiotics?
6. Moving on to the doctor/nurse management of your /your child's sore throat. Could you tell me what happened?
7. We are interested in whether having a rapid test affects your experience of visiting the GP/nurse. How did you find going to see the GP/nurse on this occasion?
8. If the rapid test was routinely available at the GP surgery, do you think it would affect your decision to see the GP if you/ your child had a sore throat? How?
9. Finally can you tell me what you think caused your sore throat on this occasion?
10. Are there any other relevant issues we haven't covered that you would like to mention?
11. Are there any questions you that would like to ask me?

## **Practitioner interview guide**

### **PART ONE: EXPERIENCES OF USING A RAPID STREP TEST**

1. Can we start by you telling me a bit about your views on rapid strep tests?
2. Do you routinely use rapid strep tests?
3. Has your perception of rapid tests changed by participating in the trial.
4. What, do you feel, are the major advantages of using the rapid strep tests?
5. In your view what are the main disadvantages of using a rapid test in routine practice?
6. Has the use of rapid tests had an effect on your management of patients with sore throat?
7. If you were to use a rapid test how would you decide who to use the rapid test on?
8. Can you describe a patient in which you feel the rapid test would not be of benefit to them and describe why?

### **PART TWO: HOW ARE PATIENTS RECRUITED TO TAKE PART IN THE TRIAL?**

1. How do you decide who to include in the trial, and who not include?
2. Have your inclusion/exclusion criteria changed over time, and if so how?

### **PART THREE: HOW DO GPs FEEL ABOUT CLINICAL SCORING**

1. Do you use a clinical score, such as the Centor score, in your routine management of a patient with a sore throat?
2. What are your feelings about such scores?
3. How do you decide who to use the score on?
4. What are the advantages of using a clinical score?
5. What are the disadvantages of using a clinical score?
6. How does either a positive or a negative result alter your management of a patient with a sore throat?

### **Conclusion**

7. Are there any other relevant issues we haven't covered that you would like to mention?
8. Are there any questions that you would like to ask me?
